# Supplementary material for: Low pH-Based Method to Increase the Yield of Plant-Derived Nanoparticles from Fresh Ginger Rhizomes
Source: PubMed Central journal article supplement — ACS Omega. 2021 Jul 1;6(27):17635–41. doi: 10.1021/acsomega.1c02162 (PMC8280662; doi:10.1021/acsomega.1c02162), 2021-07-01
Supplement: ao1c02162_si_001.pdf [file ao1c02162_si_001.pdf]

**A low pH-based method to increase the yield of plant-derived nanoparticles from fresh ginger rhizomes**

Anagha Priya Suresh<sup>a</sup>, Sreeram Peringattu Kalarikkal<sup>a</sup> Bhoomireddy Pullareddy<sup>a</sup>, Gopinath M Sundaram<sup>a,b\*</sup>

<sup>a</sup> Department of Molecular Nutrition, CSIR-Central Food Technological Research Institute, Mysuru, Karnataka-570020, India.

<sup>b</sup> Academy of Scientific and Innovative Research (AcSIR), CSIR-CFTRI Campus, Mysuru, Karnataka, India.

\*Corresponding author: [gopinath@cftri.res.in](mailto:gopinath@cftri.res.in)

**Dr. Gopinath, M**

Principal Scientist, Department of Molecular Nutrition

Central Food Technological Research Institute, CSIR-CFTRI,

Mysuru-570020, Karnataka, India

Phone No: +91-9686691486

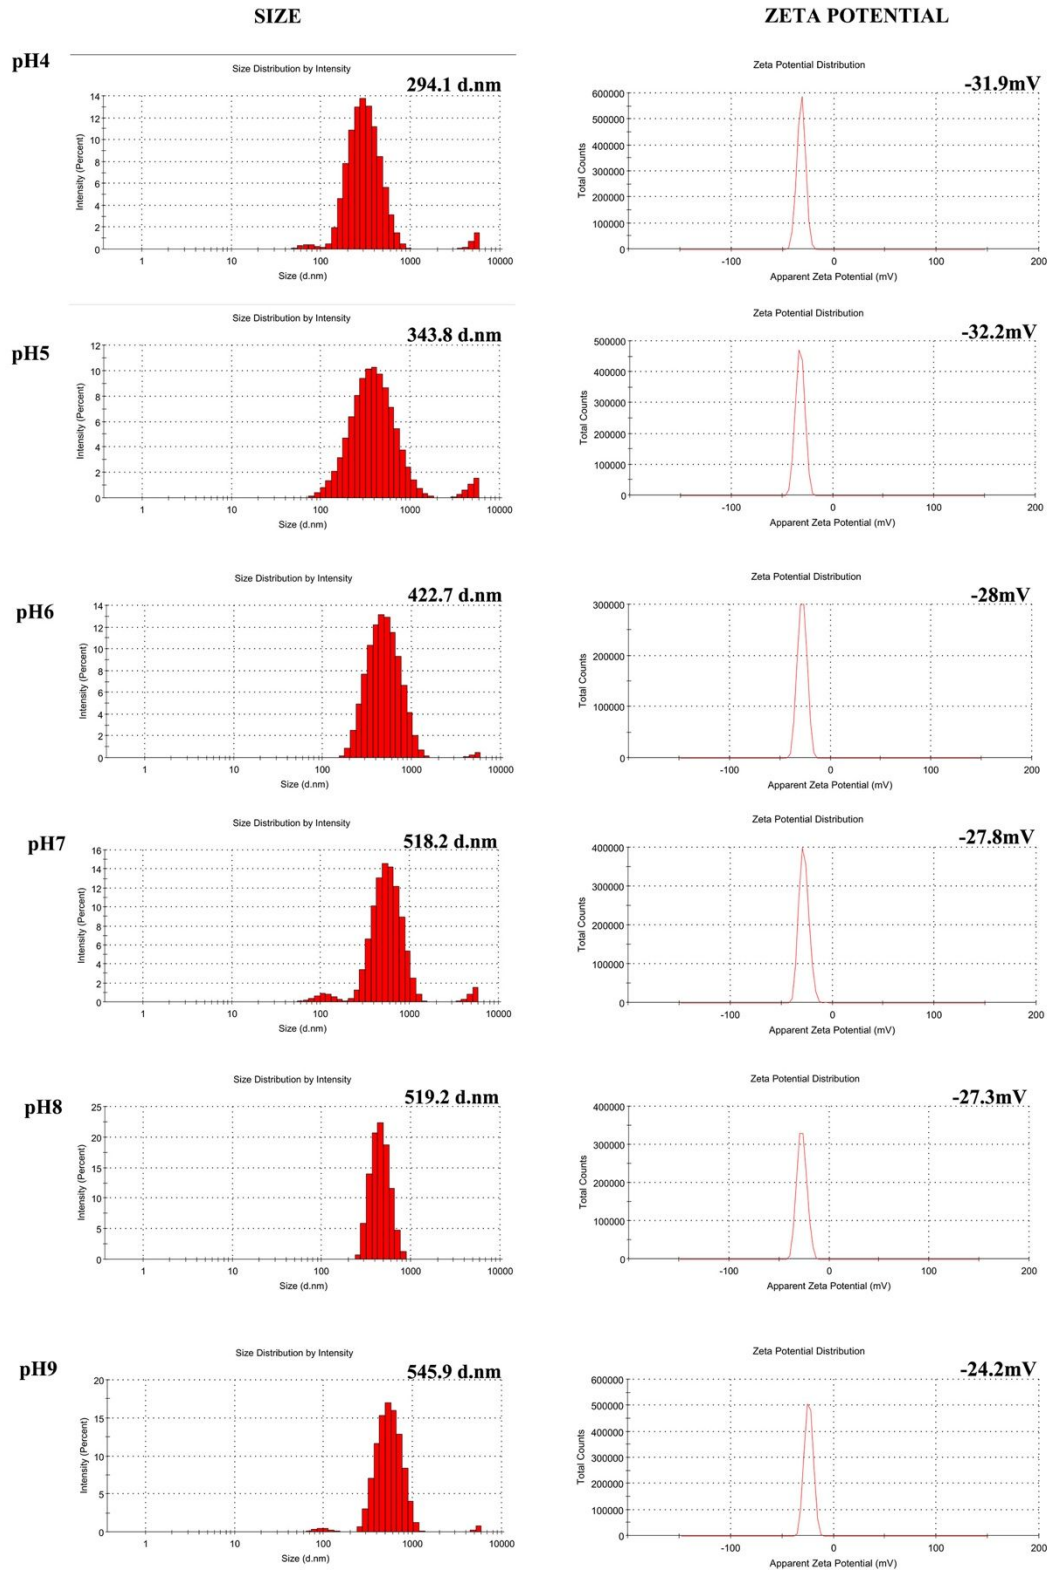

**Figure S1.** Representative size distribution and zeta potential profiles of ginger PDNPs isolated under different pH conditions.

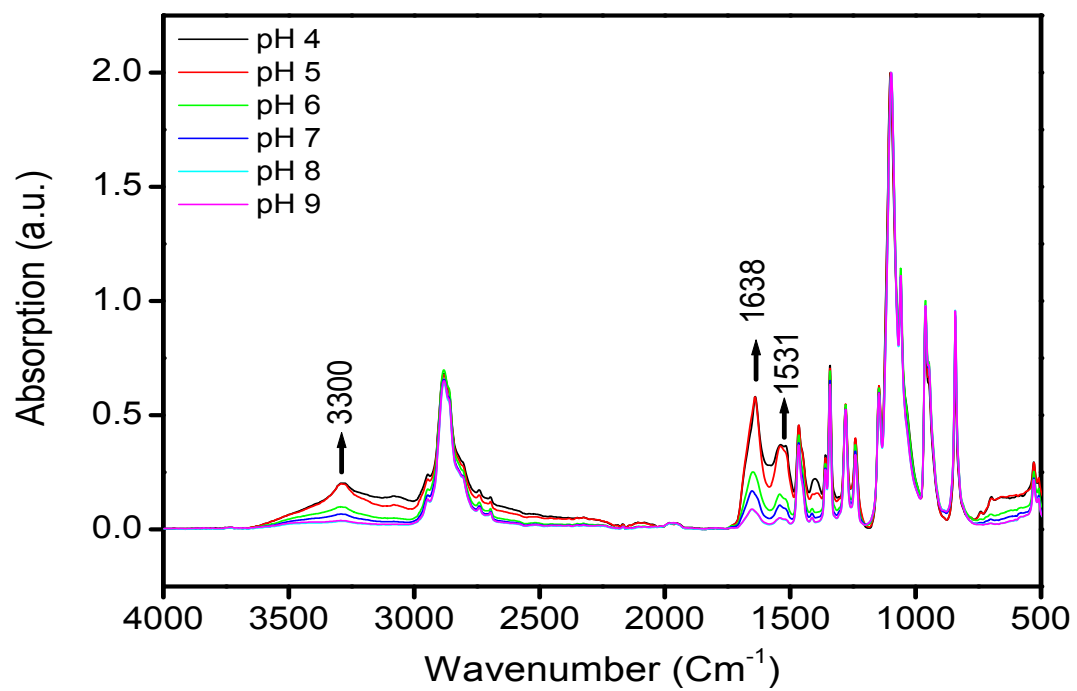

**Figure S2.** FTIR absorbance spectrum of ginger PDNPs isolated under different pH conditions.

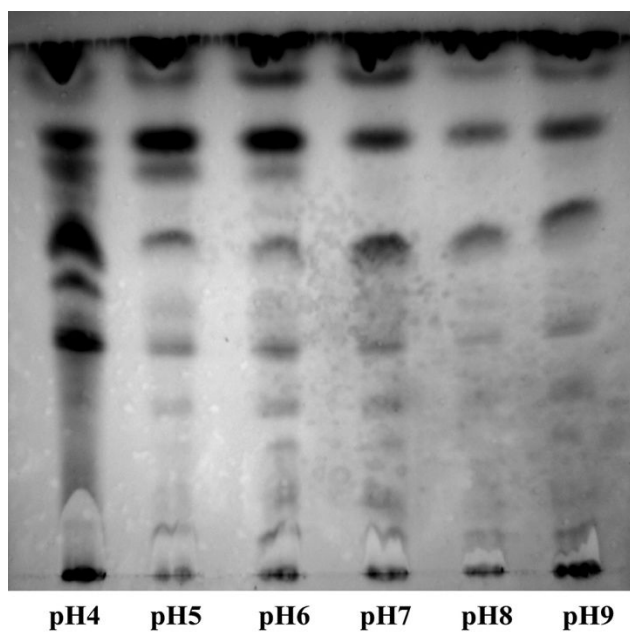

**Figure S3.** Thin layer chromatographic image showing the distribution of total lipids extracted from ginger PDNPs isolated under different pH conditions.
